# Supplementary material
Source: HighWire-hosted journal article supplement (https://www.cmaj.ca/highwire/filestream/106436/field_highwire_adjunct_files/2/210842-res-3-at.pdf)
Supplement: 210842-res-3-at.pdf [file 210842-res-3-at.pdf]

**International Classification of Diseases, 10th revision (ICD-10) codes for comorbidity ascertainment**

| <b>Clinical category</b>       | <b>ICD-10 codes (DAD)</b>                                                                                                                   |
|--------------------------------|---------------------------------------------------------------------------------------------------------------------------------------------|
| <b>Mood disorders</b>          | F06.3, F30.x-F34.x, F38.x, F39.x, F53.0                                                                                                     |
| <b>Anxiety disorders</b>       | F06.4, F40, F41, F93.0-2, F94.0                                                                                                             |
| <b>Alcohol use disorder</b>    | F100, F101, F102, F103, F104, F105, F106, F107, F108, F109, E244, G312, G621, G721, I426, K292, K852, K860, R780, T510, T519, X45, X65, Y15 |
| <b>Alcoholic liver disease</b> | K700, K701, K702, K703, K704, K709                                                                                                          |
| <b>Other liver disease</b>     | K74, K83.0, K75, B18, K73, K72, K71, K76,                                                                                                   |
